# Supplementary material
Source: PubMed Central journal article supplement (PMC307631)

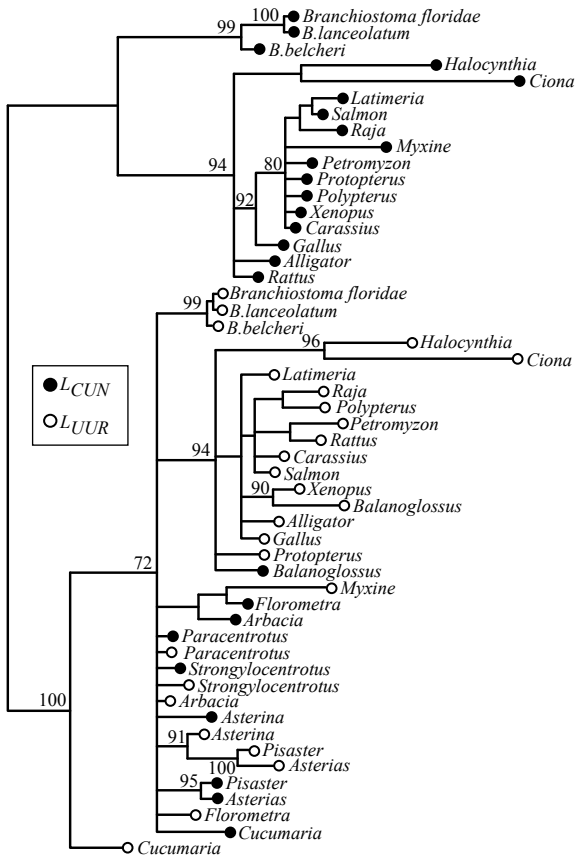

Supplement: pnas_100_26_15700__4.pdf [file pnas_100_26_15700__4.pdf]
